# Supplementary material
Source: publisher figshare collection journal article supplement (https://acs.figshare.com/ndownloader/files/4588783)
Supplement: Supplementary file 1 [file 4588783]

## X. Supporting Information – SAXS scattering data analysis details.

Here we summarize the scattering function  $I(q)$  from the disordered melt of an A-B diblock copolymer with a polydispersity in molecular weight and an asymmetry in segmental volume. The details are given in Leibler, L. *Macromolecules* **1980**, *13*, 1602-1617 and in Sakurai, S *et al. Macromolecules* **1992**, *25*, (10), 2679-2691.

$$I(q) = K[S(q)/W(q) - 2\chi]^{-1} \quad (\text{A1})$$

where  $K$  is a proportionality constant which is not important in the present work and  $\chi$  is defined in the text.

$$S(q) = \langle S_{S,S}(q) \rangle_v + 2\langle S_{S,MMA}(q) \rangle_v + \langle S_{MMA,MMA}(q) \rangle_v \quad (\text{A2})$$

$$W(q) = \langle S_{S,S}(q) \rangle_v \langle S_{MMA,MMA}(q) \rangle_v + \langle S_{S,MMA}(q) \rangle_v^2 \quad (\text{A3})$$

where

$$\langle S_{X,X}(q) \rangle_v = r_{c,n} f_{X,n}^2 g_{X,n}^{(2)}(q) \quad (\text{A4})$$

$$\langle S_{S,MMA}(q) \rangle_v = r_{c,n} f_S f_{MMA} g_{S,n}^{(1)}(q) g_{MMA,n}^{(1)}(q) \quad (\text{A5})$$

$$r_{c,n} = (v_S N_{S,n} + v_{MMA} N_{MMA,n}) / (v_S + v_{MMA})^{1/2} \quad (\text{A6})$$

$$g_{X,n}^{(1)}(q) = \frac{1}{x_{X,n}} \{1 - [x_{X,n} (\lambda_X - 1) + 1]^{-(\lambda_X - 1)^{-1}}\} \quad (\text{A7})$$

$$g_{X,n}^{(2)}(q) = \frac{2}{x_{X,n}} \{-1 + x_{X,n} + [x_{X,n} (\lambda_X - 1) + 1]^{-(\lambda_X - 1)^{-1}}\} \quad (\text{A8})$$

$$x_{X,n} \equiv (N_{X,n} b_X^2 / 6) q^2 \quad (\text{A9})$$

$$\lambda_{X,n} = N_{X,w} / N_{X,n} \quad (\text{A10})$$

Where  $X = S$  or  $MMA$ ,  $v_X$  is the molecular volume of  $X$ , with  $v_S \sim 100 \text{ cm}^3/\text{mol}$  and  $v_{MMA} \sim 84.7$

cm<sup>3</sup>/mol.  $f_X$  is the volume fraction of X.  $N_{X,n}$  and  $N_{X,w}$  is the number-average and weight-average degree of polymerization of X block chain, respectively.  $b_X$  is the segment length of X, where  $b_S \sim 0.68$  nm, and  $b_{MMA} \sim 0.74$  nm. Here we assume  $\lambda_S = \lambda_{MMA} \equiv \lambda$ , which can be estimated from  $M_w/M_n$  for the block copolymer chains as a whole,

$$\lambda = (M_w / M_n - 1) / (w_S^2 + w_{MMA}^2) + 1 \quad (\text{A11})$$

Where  $w_S = 1 - w_{MMA}$  is the weight fraction of S block chain in the PS-*b*-PMMA block copolymers. All parameters used are summarized in Table 1.  $\chi$  was determined as a value which gives rise to a best fit between the experimental and theoretical relative intensity distributions, and summarized in Table 2.

Table 1. Characteristic Parameters Used to Evaluate  $\chi$  values.

| Sample | $w_s$ | $f_s$ | $N_s$ | $N_{MMA}$ | $\lambda$ | $r_{c,n}$ |
|--------|-------|-------|-------|-----------|-----------|-----------|
| 1      | 0.53  | 0.56  | 143   | 131       | 1.1       | 276       |
| 2      | 0.5   | 0.53  | 123   | 129       | 1.1       | 252       |

Table 2. Temperature dependence of  $\chi$  values.

| T, °C | $\chi$ for sample 1 | $\chi$ for sample 2 |
|-------|---------------------|---------------------|
| 230   | 0.0373              |                     |
| 220   | 0.0374              | 0.0373              |
| 210   | 0.0375              | 0.0375              |
| 200   |                     | 0.0377              |
| 190   |                     | 0.0379              |
| 180   |                     | 0.0381              |
| 170   |                     | 0.0382              |
| 160   |                     | 0.0383              |
| 150   |                     | 0.0384              |
| 140   |                     | 0.0385              |
| 130   |                     | 0.03854             |
| 120   |                     | 0.03856             |
